# Supplementary material for: Metabolomics and lipidomics in Caenorhabditis elegans using a single-sample preparation
Source: PubMed Central journal article supplement (PMC8106956; doi:10.1242/dmm.047746), 2021-04-27
Supplement: dmm-14-047746-s1.pdf [file dmm-14-047746-s1.pdf]

### Figure S1

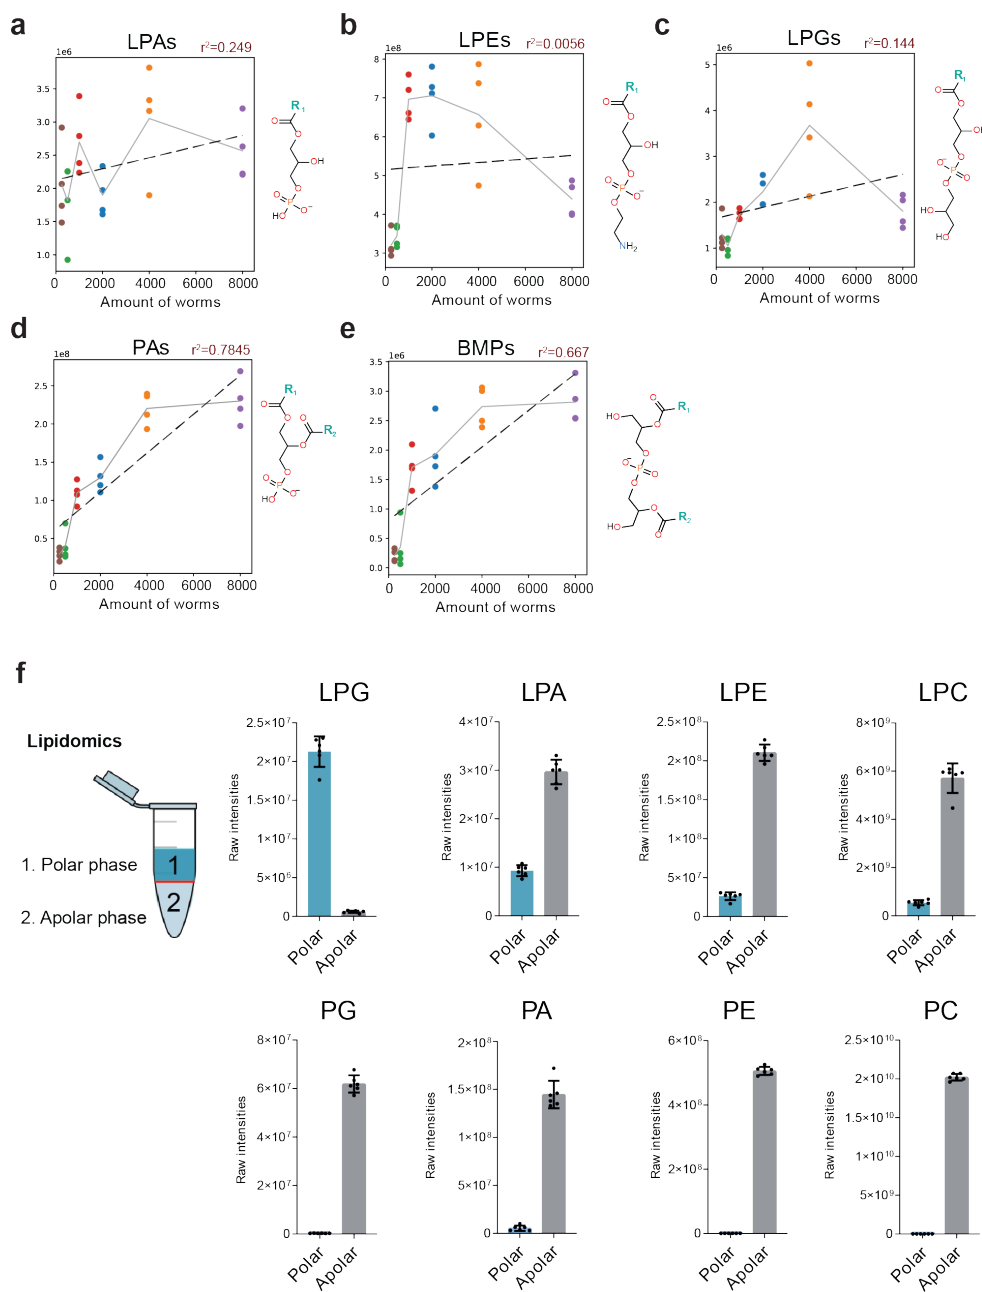

**Fig. S1 | Validation of lipids extracted from apolar phase on the polar side of the lipid spectrum.** Linearity of **a**, LPA **b**, LPE **c**, LPG **d**, PA **e**, BMP. Chemical structure of the classes are depicted on the right of each graph. **f**, Partitioning of internal standards into apolar/polar phase. Internal standards of lyso-lipid species LPG, LPA, LPE, LPC partially go to the polar phase, while non-lyso counterparts stay in the apolar phase.

Figure S2

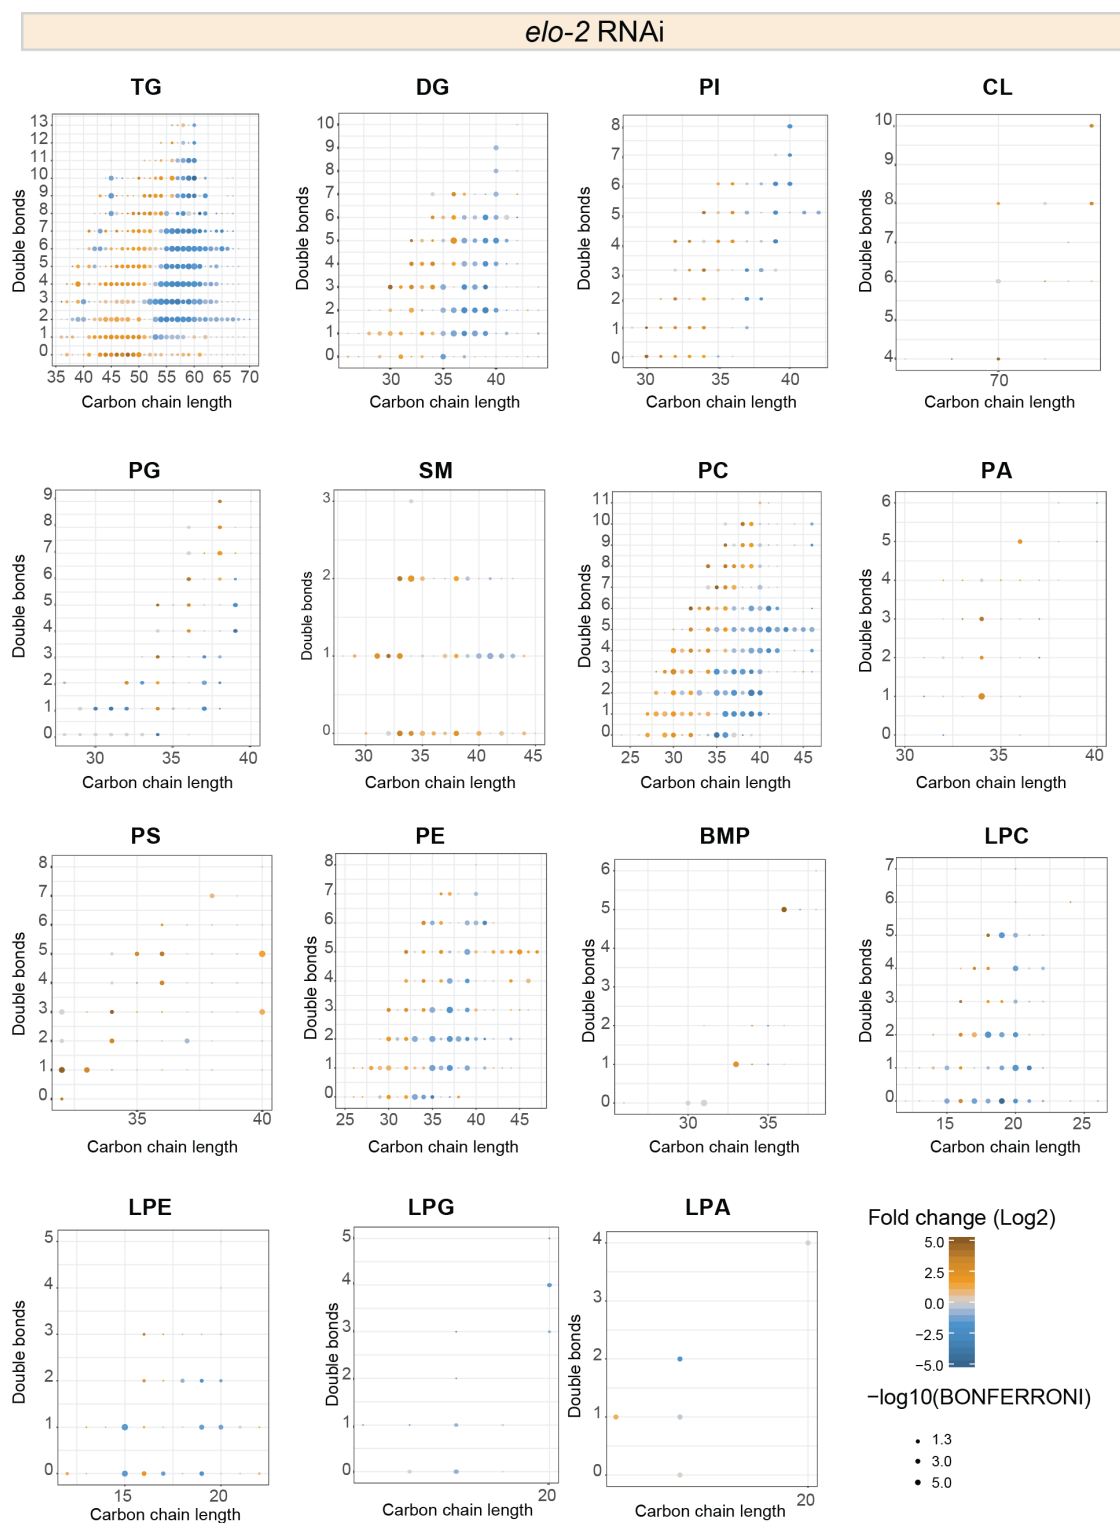

**Fig. S2 | Phospholipid changes in all classes in worms treated with *elo-2* RNAi.** Changes in the composition of almost all classes shows significant decrease of phospholipids with long carbon-chain length and significant increase of species with short carbon-chain length.

Figure S3

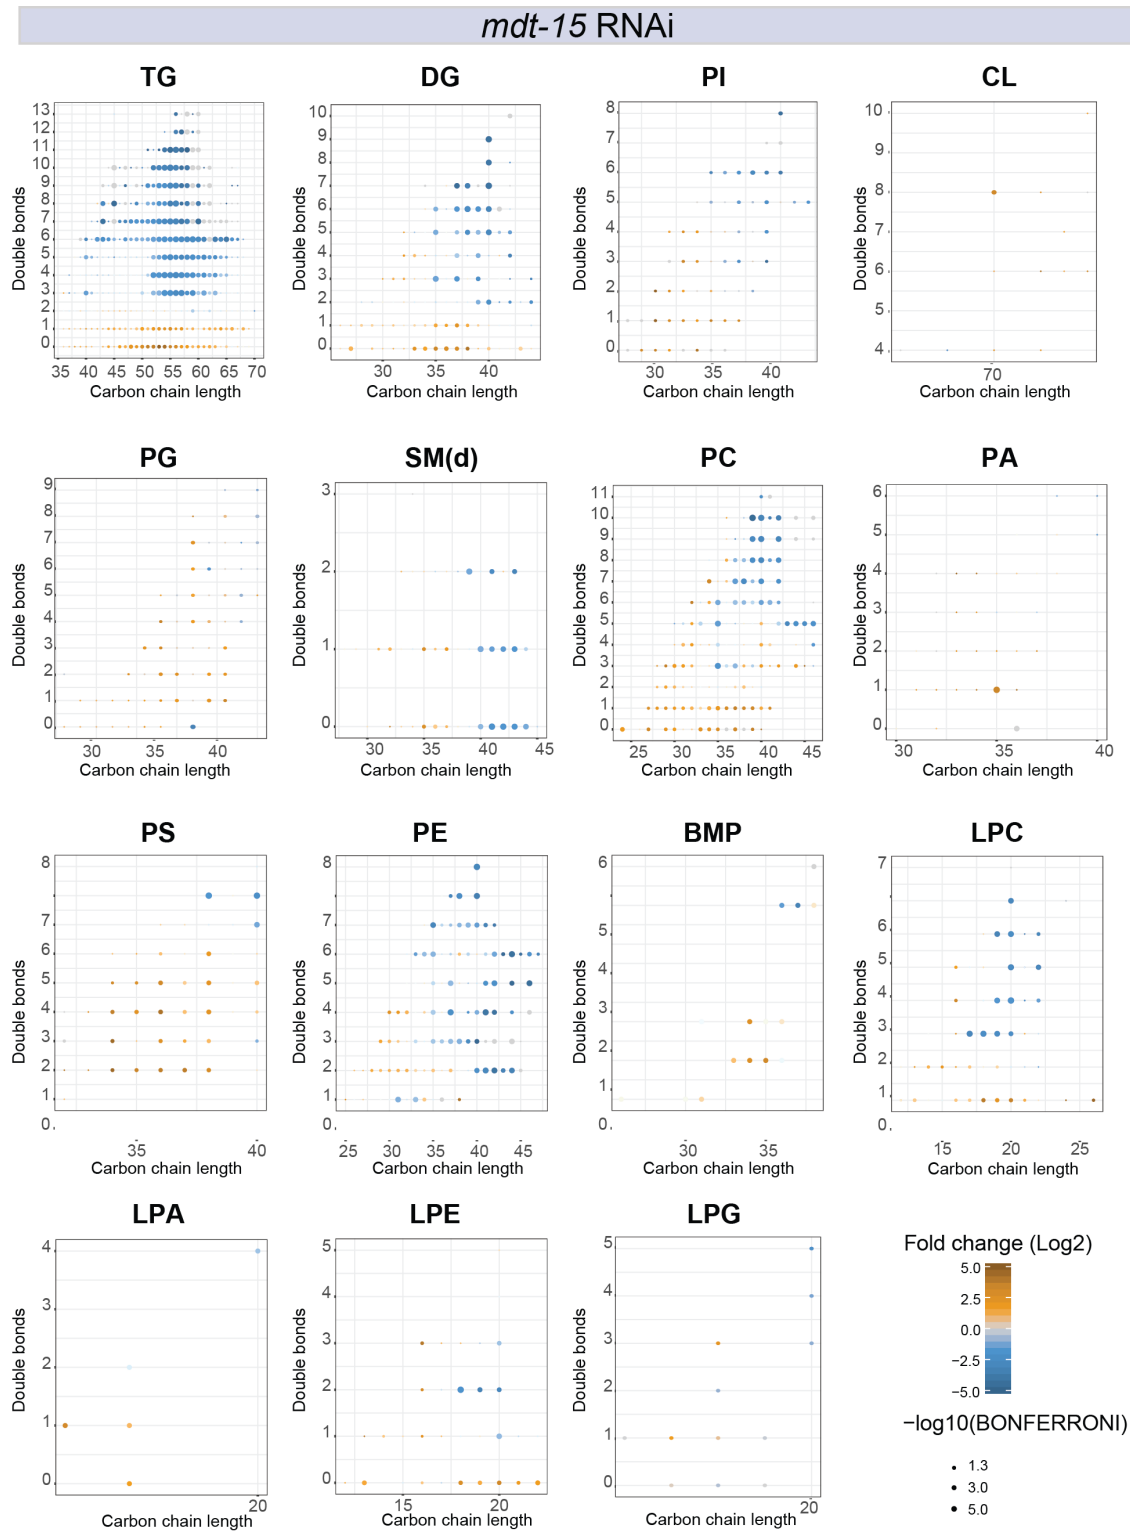

**Fig. S3 | Phospholipid changes in all classes in worms treated with *mdt-15* RNAi.** Changes in phospholipids of many species shows significant decrease of lipids with >2 double bonds and increase of PL with <2 double bonds.

Table S1. Data used to create Fig. 1B-E

[Click here to Download Table S1](#)

Table S2. Data used to create Fig. 1F-M

[Click here to Download Table S2](#)

Table S3. Data used to create Fig. 2

[Click here to Download Table S3](#)

Table S4. RNAi conditions used in Figs 3 and 4

[Click here to Download Table S4](#)

Table S5. Data used to create Fig. 5 (metabolomics and lipidomics data)

[Click here to Download Table S5](#)
